# Supplementary material
Source: MDPI journal article supplement (https://www.mdpi.com/2073-4395/12/2/519)
Supplement: s1 [file s1]

Supplementary

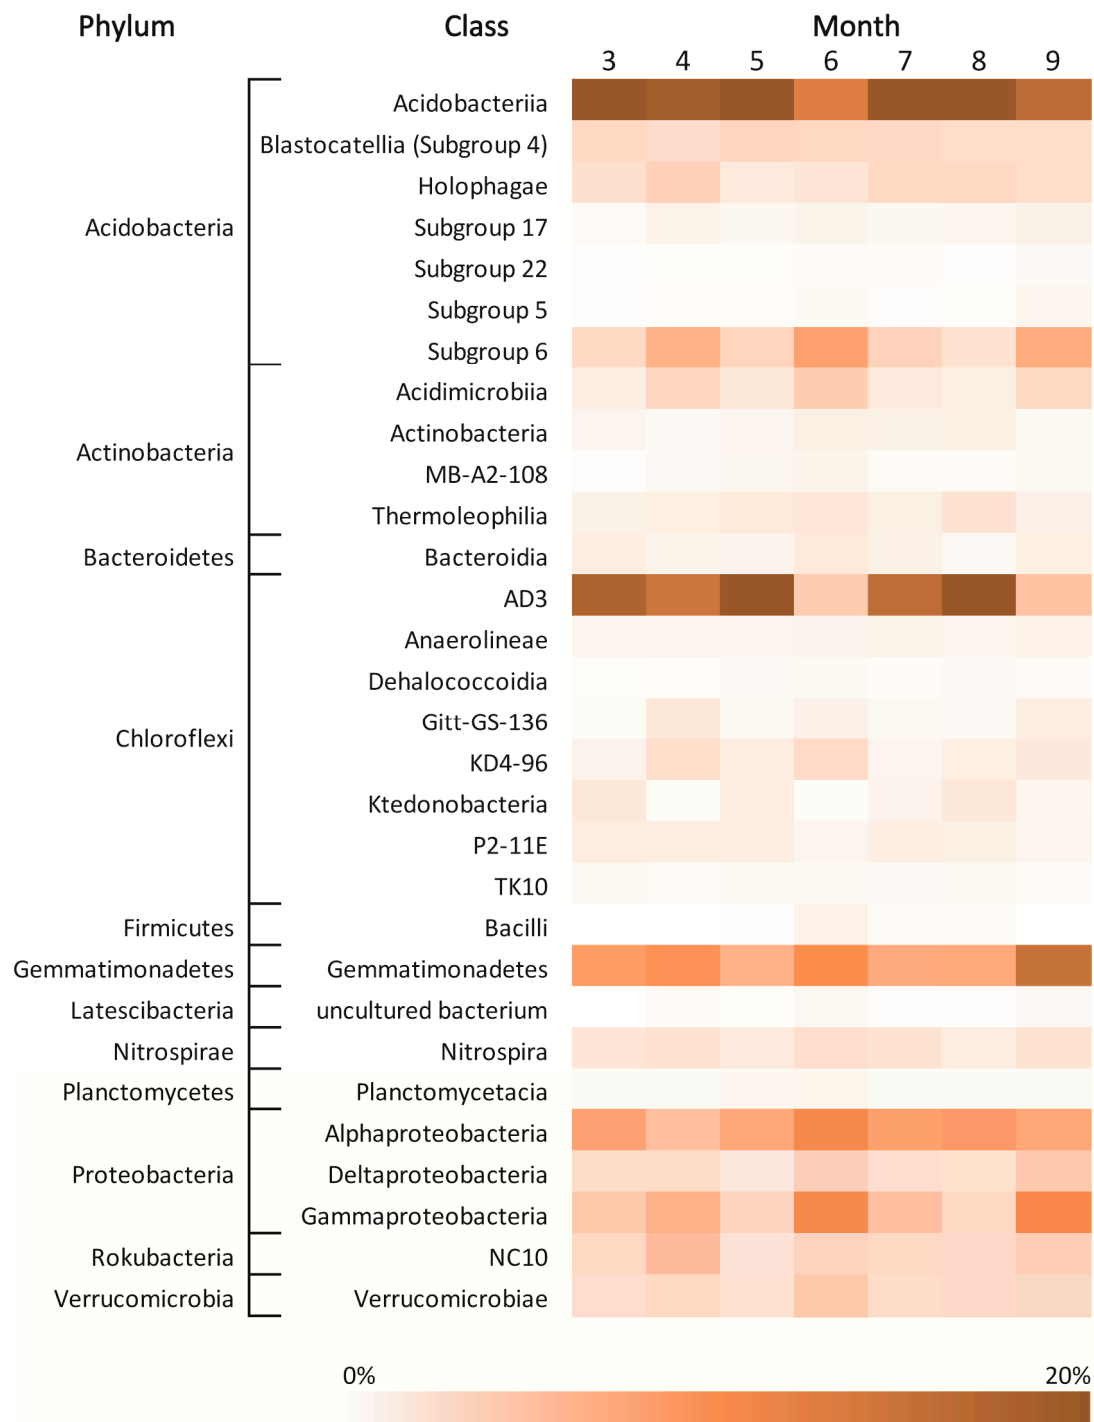

**Figure S1.** Heatmap of relative abundances of different classes in the total bacterial communities in the lower soil horizon throughout the season.

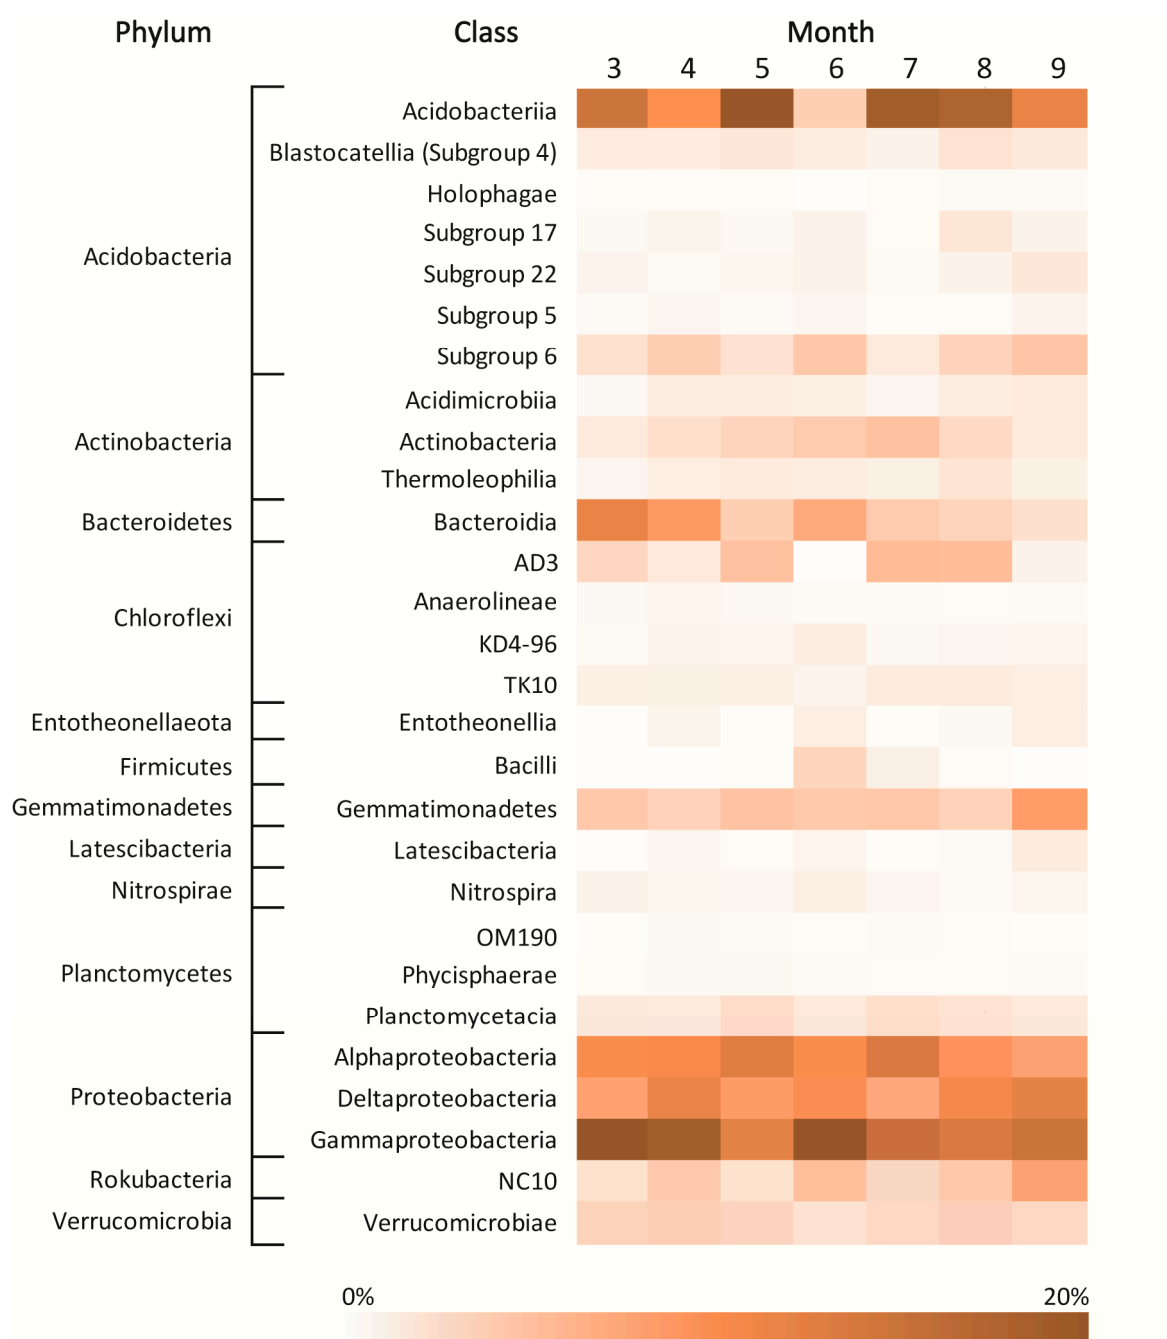

**Figure S2.** Heatmap of relative abundances of different classes in the active bacterial communities in the lower soil horizon throughout the season.

**Table S1.** Water extractable organic carbon and nitrogen contents in two soil horizons.

| Sampling month | Sampling date | 10 cm                 |                       |                       |                       | 55 cm                 |                       |                       |                       |
|----------------|---------------|-----------------------|-----------------------|-----------------------|-----------------------|-----------------------|-----------------------|-----------------------|-----------------------|
|                |               | WEOC, %               |                       | WEON, %               |                       | WEOC, %               |                       | WEON, %               |                       |
|                |               | Mean                  | SD                    | Mean                  | SD                    | Mean                  | SD                    | Mean                  | SD                    |
| 3              | 23.03.2017    | $2.61 \times 10^{-2}$ | $4.29 \times 10^{-3}$ | $3.84 \times 10^{-3}$ | $1.91 \times 10^{-3}$ | $5.08 \times 10^{-3}$ | $1.02 \times 10^{-3}$ | $3.62 \times 10^{-4}$ | $2.33 \times 10^{-4}$ |
| 4              | 04.05.2017    | $2.92 \times 10^{-2}$ | $3.21 \times 10^{-3}$ | $3.34 \times 10^{-3}$ | $5.36 \times 10^{-4}$ | $6.33 \times 10^{-3}$ | $6.45 \times 10^{-4}$ | $4.83 \times 10^{-4}$ | $3.05 \times 10^{-5}$ |
| 5              | 30.05.2017    | $7.41 \times 10^{-3}$ | $7.92 \times 10^{-4}$ | $2.36 \times 10^{-4}$ | $1.10 \times 10^{-4}$ | $1.81 \times 10^{-3}$ | $4.38 \times 10^{-4}$ | $2.76 \times 10^{-5}$ | $1.33 \times 10^{-5}$ |
| 6              | 29.06.2017    | $3.23 \times 10^{-2}$ | $2.38 \times 10^{-3}$ | $2.82 \times 10^{-3}$ | $5.79 \times 10^{-4}$ | $6.26 \times 10^{-3}$ | $5.70 \times 10^{-4}$ | $4.43 \times 10^{-4}$ | $1.71 \times 10^{-4}$ |
| 7              | 26.07.2017    | $7.71 \times 10^{-3}$ | $1.05 \times 10^{-3}$ | $4.36 \times 10^{-4}$ | $1.99 \times 10^{-4}$ | $2.40 \times 10^{-3}$ | $1.02 \times 10^{-3}$ | $4.73 \times 10^{-5}$ | $2.86 \times 10^{-5}$ |
| 8              | 30.08.2017    | $7.26 \times 10^{-3}$ | $1.32 \times 10^{-3}$ | $2.96 \times 10^{-4}$ | $1.25 \times 10^{-4}$ | $1.86 \times 10^{-3}$ | $1.63 \times 10^{-4}$ | $3.06 \times 10^{-5}$ | $1.15 \times 10^{-5}$ |
| 9              | 28.09.2017    | $1.35 \times 10^{-2}$ | $5.68 \times 10^{-3}$ | $1.17 \times 10^{-3}$ | $1.02 \times 10^{-3}$ | $3.54 \times 10^{-3}$ | $8.90 \times 10^{-4}$ | $1.94 \times 10^{-4}$ | $1.45 \times 10^{-4}$ |
| 10             | 30.10.2017    | $3.18 \times 10^{-2}$ | $1.67 \times 10^{-3}$ | $3.08 \times 10^{-3}$ | $4.25 \times 10^{-4}$ | $6.82 \times 10^{-3}$ | $7.13 \times 10^{-4}$ | $6.03 \times 10^{-4}$ | $1.06 \times 10^{-4}$ |
| 11             | 30.11.2017    | $2.29 \times 10^{-2}$ | $6.31 \times 10^{-3}$ | $1.09 \times 10^{-3}$ | $4.30 \times 10^{-4}$ | $5.04 \times 10^{-3}$ | $6.81 \times 10^{-4}$ | $1.24 \times 10^{-4}$ | $9.07 \times 10^{-5}$ |
| 12             | 25.12.2017    | $8.36 \times 10^{-3}$ | $1.02 \times 10^{-3}$ | $2.62 \times 10^{-4}$ | $7.57 \times 10^{-5}$ | $1.76 \times 10^{-3}$ | $4.63 \times 10^{-4}$ | $3.17 \times 10^{-5}$ | $1.23 \times 10^{-5}$ |
| 1              | 30.01.2018    | $1.72 \times 10^{-2}$ | $1.50 \times 10^{-3}$ | $1.71 \times 10^{-3}$ | $8.01 \times 10^{-4}$ | $4.31 \times 10^{-3}$ | $5.66 \times 10^{-4}$ | $1.30 \times 10^{-4}$ | $2.66 \times 10^{-5}$ |
| 2              | 01.03.2018    | $3.02 \times 10^{-2}$ | $6.47 \times 10^{-3}$ | $2.80 \times 10^{-3}$ | $4.34 \times 10^{-4}$ | $6.31 \times 10^{-3}$ | $1.57 \times 10^{-3}$ | $1.84 \times 10^{-4}$ | $1.16 \times 10^{-4}$ |

**Table S2.** Pearson correlations between estimated physical and microbiological parameters in upper horizons of studied soil (for all year). Pairwise deletion of missing data. \*  $p < 0.050$ . \*\*  $p < 0.01$  and \*\*\*  $p < 0.001$ .

|                                | Soil<br>moisture | WEOC          | WEON          | DNA<br>content<br>µg/g of<br>soil | air<br>temperature | soil<br>temperature | Bact.<br>16S<br>gene<br>conc.<br>in<br>DNA | Bact.<br>16S<br>gene<br>conc.<br>in<br>RNA | Arch<br>16S<br>gene<br>conc.<br>in<br>DNA |
|--------------------------------|------------------|---------------|---------------|-----------------------------------|--------------------|---------------------|--------------------------------------------|--------------------------------------------|-------------------------------------------|
| WEOC                           | 0.3135 *         |               |               |                                   |                    |                     |                                            |                                            |                                           |
| WEON                           | 0.4308<br>**     | 0.8285<br>*** |               |                                   |                    |                     |                                            |                                            |                                           |
| DNA content<br>µg/g of soil    | 0.0912           | -0.1913       | -0.0559       |                                   |                    |                     |                                            |                                            |                                           |
| air temperature                | -0.3705<br>**    | -0.3725<br>** | -0.2643       | 0.7180<br>***                     |                    |                     |                                            |                                            |                                           |
| soil<br>temperature            | -0.5389<br>***   | -0.3967<br>** | -0.3482<br>** | 0.6323<br>***                     | 0.9626 ***         |                     |                                            |                                            |                                           |
| Bact. 16S gene<br>conc. in DNA | 0.1631           | -0.3455<br>*  | -0.2118       | 0.6766<br>***                     | 0.5879 ***         | 0.4477 **           |                                            |                                            |                                           |
| Bact. 16S gene<br>conc. in RNA | 0.2405           | -0.3121<br>*  | -0.1236       | 0.5957<br>***                     | 0.5544 ***         | 0.4309 **           | 0.8142<br>***                              |                                            |                                           |
| Arch 16S gene<br>conc. in DNA  | 0.1185           | -0.0177       | 0.0905        | 0.7381<br>***                     | 0.5353 ***         | 0.5074 ***          | 0.3947<br>**                               | 0.4636<br>***                              |                                           |
| Arch 16S gene<br>conc. in RNA  | -0.0679          | -0.4091<br>** | -0.2678       | 0.4842<br>***                     | 0.4155 **          | 0.4667 ***          | 0.2933                                     | 0.5595<br>***                              | 0.5392<br>***                             |

**Table S3.** Pearson correlations between estimated physical and microbiological parameters in lower horizons of studied soil (for all year). Pairwise deletion of missing data. \*  $p < 0.050$ . \*\*  $p < 0.01$  and \*\*\*  $p < 0.001$

|                             | Soil moisture | WEOC       | WEON     | DNA content<br>μg/g of soil | air temperature | soil temperature | Bact. 16S gene conc. in DNA | Bact. 16S gene conc. in RNA | Arch 16S gene conc. in DNA |
|-----------------------------|---------------|------------|----------|-----------------------------|-----------------|------------------|-----------------------------|-----------------------------|----------------------------|
| WEOC                        | 0.1429        |            |          |                             |                 |                  |                             |                             |                            |
| WEON                        | 0.1642        | 0.7948 *** |          |                             |                 |                  |                             |                             |                            |
| DNA content<br>μg/g of soil | 0.0255        | 0.2607     | 0.1510   |                             |                 |                  |                             |                             |                            |
| air temperature             | -0.1677       | -0.3581 ** | -0.1615  | 0.0783                      |                 |                  |                             |                             |                            |
| soil temperature            | -0.3931 **    | -0.3604 ** | -0.1701  | 0.0550                      | 0.9525 ***      |                  |                             |                             |                            |
| Bact. 16S gene conc. in DNA | 0.2512        | 0.0071     | 0.0220   | 0.6405 ***                  | 0.1712          | 0.0368           |                             |                             |                            |
| Bact. 16S gene conc. in RNA | 0.3947 **     | 0.0350     | 0.1354   | 0.4507 **                   | 0.2354          | 0.0860           | 0.7617 ***                  |                             |                            |
| Arch 16S gene conc. in DNA  | 0.0128        | 0.2461     | 0.3478 * | 0.7297 ***                  | 0.1454          | 0.1755           | 0.5564 ***                  | 0.3297 *                    |                            |
| Arch 16S gene conc. in RNA  | 0.3170 *      | 0.1257     | 0.2632   | 0.1591                      | -0.0709         | -0.1482          | 0.3417 *                    | 0.7232 ***                  | 0.1375                     |

**Table S4.**  $\alpha$ -diversity indices estimated for prokaryotic communities using the analysis of 16S rRNA gene library for upper and lower horizons.

| Depth    | Sampling month | PD whole tree |       | Chao1   |        | Observed otus |        | Shannon |      |
|----------|----------------|---------------|-------|---------|--------|---------------|--------|---------|------|
|          |                | Mean          | SD    | Mean    | SD     | Mean          | SD     | Mean    | SD   |
| 10<br>cm | 3              | 91.69         | 2.29  | 2376.50 | 83.69  | 1334.60       | 63.55  | 9.50    | 0.13 |
|          | 4              | 98.22         | 5.52  | 2495.56 | 231.06 | 1426.40       | 71.24  | 9.68    | 0.10 |
|          | 5              | 96.44         | 3.78  | 2485.85 | 216.72 | 1385.60       | 63.38  | 9.59    | 0.11 |
|          | 6              | 98.69         | 3.56  | 2636.73 | 341.47 | 1440.40       | 87.20  | 9.69    | 0.12 |
|          | 7              | 92.67         | 2.80  | 2407.70 | 141.91 | 1355.40       | 26.14  | 9.55    | 0.06 |
|          | 8              | 96.81         | 5.55  | 2612.53 | 171.99 | 1409.00       | 110.26 | 9.60    | 0.25 |
|          | 9              | 99.10         | 3.45  | 2471.52 | 119.59 | 1424.60       | 54.74  | 9.69    | 0.09 |
|          | 10             | 76.20         | 4.04  | 1691.88 | 123.02 | 1154.50       | 42.23  | 9.30    | 0.06 |
|          | 12             | 79.06         | 13.32 | 1907.64 | 592.52 | 1184.25       | 243.56 | 9.33    | 0.33 |
|          | 2              | 69.98         | 18.19 | 1507.82 | 720.70 | 996.50        | 367.28 | 8.99    | 0.70 |
|          | 3              | 66.70         | 10.31 | 1795.95 | 402.20 | 900.25        | 180.69 | 7.92    | 0.60 |
| 55<br>cm | 4              | 68.61         | 11.25 | 1658.26 | 342.34 | 925.40        | 198.35 | 8.19    | 0.63 |
|          | 5              | 67.17         | 16.23 | 1705.11 | 562.05 | 891.75        | 258.27 | 7.63    | 0.77 |
|          | 6              | 78.81         | 4.58  | 2089.94 | 222.92 | 1113.00       | 73.54  | 8.78    | 0.19 |
|          | 7              | 65.40         | 4.31  | 1538.92 | 79.86  | 854.25        | 62.71  | 7.89    | 0.17 |
|          | 8              | 72.64         | 6.15  | 1943.24 | 239.22 | 961.20        | 101.78 | 7.90    | 0.44 |
|          | 9              | 75.72         | 10.50 | 1909.91 | 346.70 | 1018.40       | 173.19 | 8.55    | 0.52 |

**Table S5.**  $\alpha$ -diversity indices for prokaryotic communities using the analysis of 16S rRNA gene transcripts library for upper and lower horizons.

| Depth | Sampling month | PD whole tree |       | Chao1   |        | Observed otus |        | Shannon |      |
|-------|----------------|---------------|-------|---------|--------|---------------|--------|---------|------|
|       |                | Mean          | SD    | Mean    | SD     | Mean          | SD     | Mean    | SD   |
| 10 cm | 3              | 115.39        | 4.97  | 2735.83 | 359.20 | 1798.80       | 89.36  | 9.86    | 0.04 |
|       | 4              | 113.64        | 2.73  | 2724.62 | 143.34 | 1744.50       | 66.00  | 9.66    | 0.18 |
|       | 5              | 118.68        | 5.26  | 2912.80 | 183.08 | 1838.60       | 81.26  | 9.86    | 0.12 |
|       | 6              | 113.38        | 7.23  | 2943.73 | 557.20 | 1818.60       | 198.80 | 9.66    | 0.27 |
|       | 7              | 113.84        | 4.87  | 2999.35 | 61.08  | 1817.80       | 26.92  | 9.69    | 0.11 |
|       | 8              | 111.73        | 6.83  | 2762.86 | 299.11 | 1773.25       | 127.38 | 9.78    | 0.16 |
|       | 9              | 113.08        | 3.77  | 2772.05 | 162.61 | 1788.00       | 71.40  | 9.85    | 0.10 |
|       | 10             | 116.68        | 10.36 | 3250.55 | 330.61 | 1930.00       | 175.27 | 9.87    | 0.30 |
|       | 12             | 116.42        | 7.60  | 3091.58 | 282.11 | 1899.40       | 161.72 | 9.92    | 0.25 |
|       | 2              | 120.79        | 5.35  | 3153.16 | 148.53 | 1952.40       | 123.92 | 9.97    | 0.15 |
|       | 3              | 90.27         | 8.35  | 1981.42 | 435.08 | 1326.67       | 191.92 | 8.77    | 0.27 |
| 55 cm | 4              | 103.77        | 15.20 | 2613.69 | 601.39 | 1615.25       | 290.58 | 9.41    | 0.51 |
|       | 5              | 108.72        | 1.38  | 2818.33 | 126.45 | 1716.00       | 63.32  | 9.28    | 0.20 |
|       | 6              | 105.09        | 9.06  | 2899.94 | 328.56 | 1675.00       | 178.96 | 9.35    | 0.19 |
|       | 7              | 93.23         | 5.87  | 2456.92 | 167.95 | 1411.50       | 117.39 | 8.72    | 0.37 |
|       | 8 <sup>#</sup> | 102.84        | n/a   | 2613.81 | n/a    | 1617.00       | n/a    | 9.05    | n/a  |
|       | 9              | 81.72         | 3.82  | 1818.11 | 223.71 | 1195.00       | 60.81  | 8.70    | 0.27 |

<sup>#</sup>for August, only 1 sample for the lower horizon was available after the filtering based on the number of sequences for the sample.
